# Supplementary material for: Scaling of an antibody validation procedure enables quantification of antibody performance in major research applications
Source: PubMed Central journal article supplement — bioRxiv. 2023 Aug 4:2023.06.01.543292. Preprint. [Version 5] doi: 10.1101/2023.06.01.543292 (PMC10312534; doi:10.1101/2023.06.01.543292), 2023-08-04

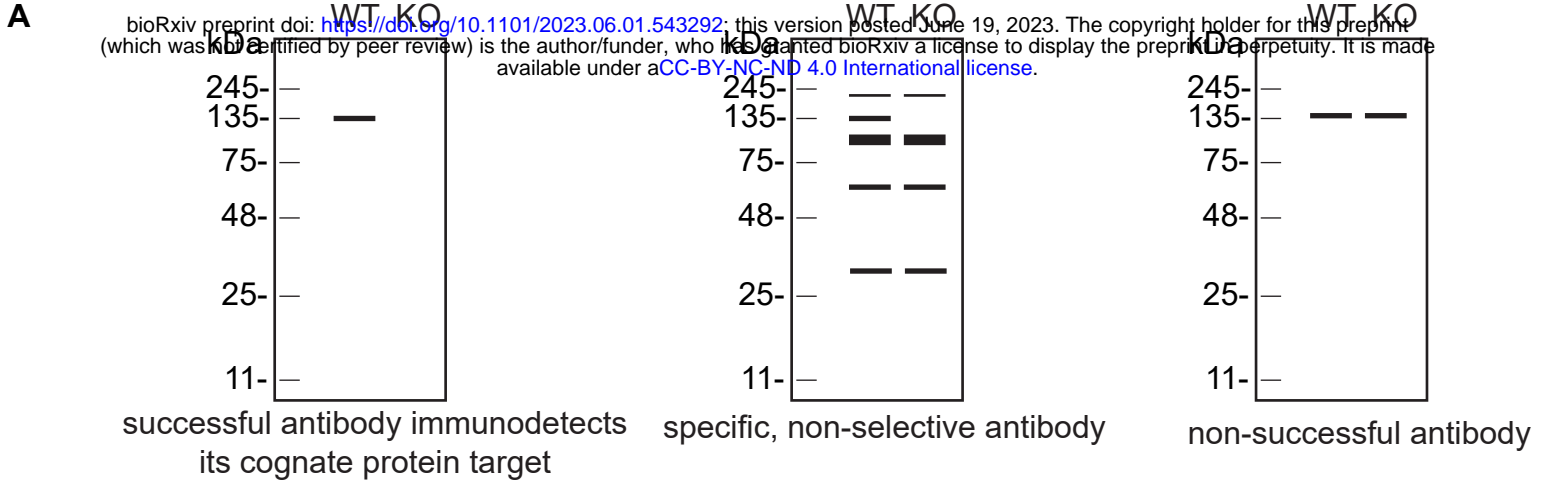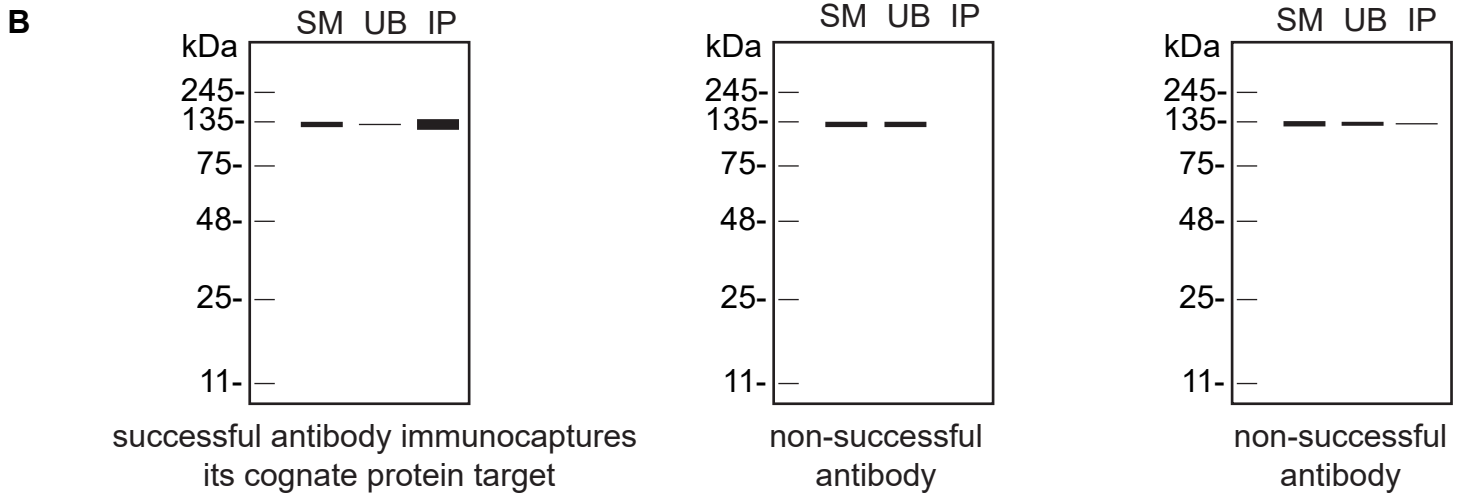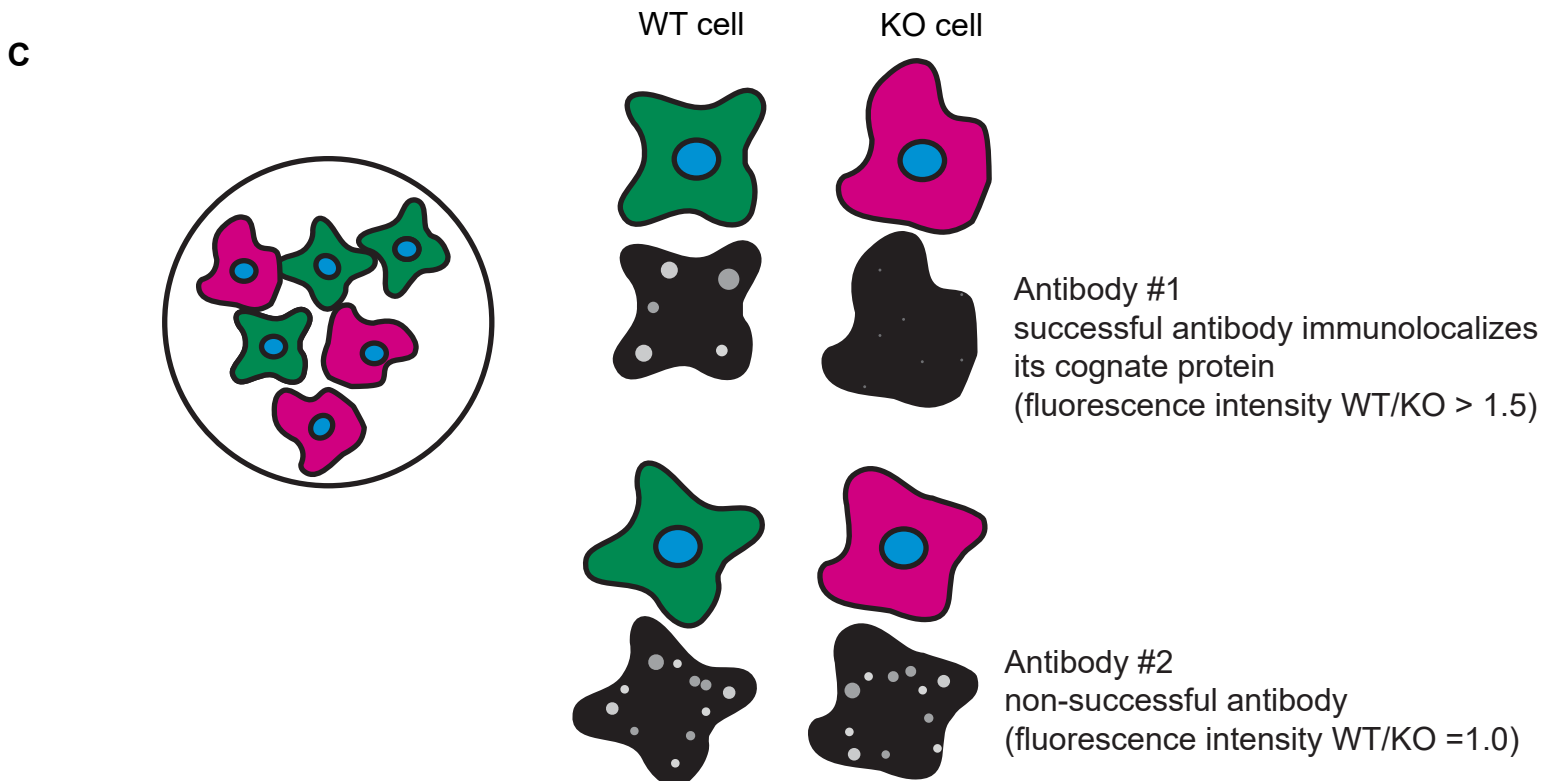

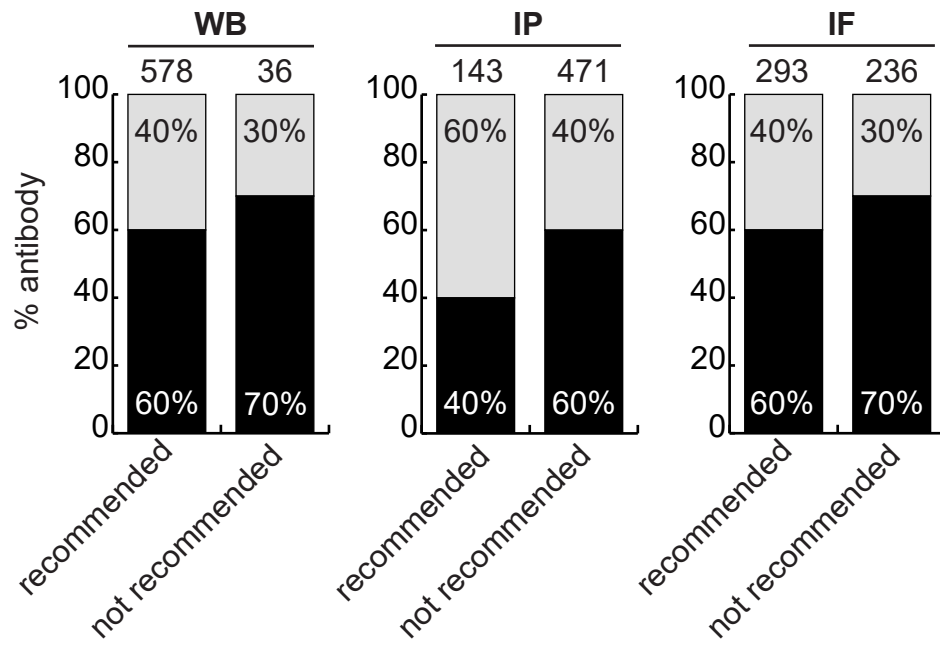

|                |      |      |      |
|----------------|------|------|------|
|                |      | fail | pass |
| application #1 | fail | a    | b    |
|                | pass | c    | d    |

$$\chi^2 = \frac{(b-c)^2}{b+c}$$

**B**

|          |          |          |
|----------|----------|----------|
|          | IP: fail | IP: pass |
| WB: fail | 190      | 101      |
| WB: pass | 126      | 112      |

$$\chi^2=1.3$$

$$p>0.1$$

**C**

|          |          |          |
|----------|----------|----------|
|          | IP: fail | IP: pass |
| IF: fail | 255      | 98       |
| IF: pass | 61       | 115      |

$$\chi^2=8.6$$

$$p<0.005$$

**D**

|          |          |          |
|----------|----------|----------|
|          | WB: fail | WB: pass |
| IF: fail | 232      | 121      |
| IF: pass | 59       | 117      |

$$\chi^2=21.4$$

$$p<0.0005$$

WB: pass  
IP: fail

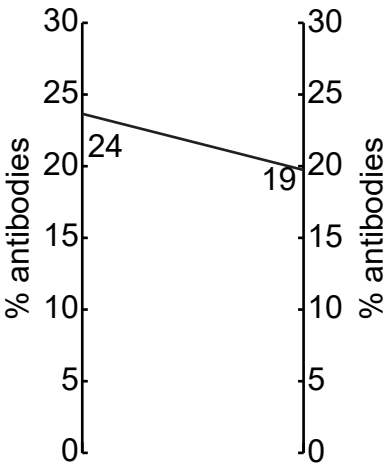

IF: pass  
IP: fail

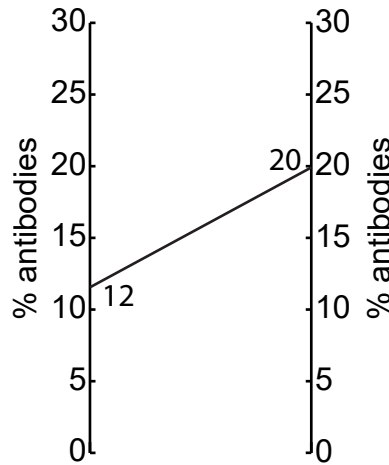

IF: pass  
WB: fail

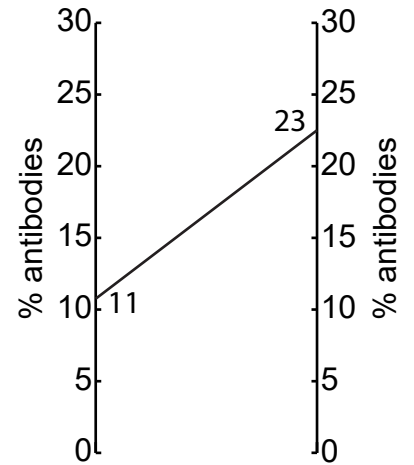

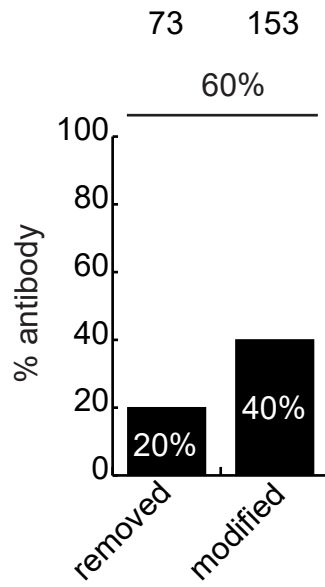

Supplement: NIHPP2023.06.01.543292v2-supplement-3.pdf [file NIHPP2023.06.01.543292v2-supplement-3.pdf]
